# Supplementary material for: A systematic review, meta-analysis, and meta-regression of the prevalence of self-reported disordered eating and associated factors among athletes worldwide
Source: PubMed Central journal article supplement (PMC10851573; doi:10.1186/s40337-024-00982-5), 2024-02-07
Supplement: 40337_2024_982_MOESM1_ESM.pdf [file 40337_2024_982_MOESM1_ESM.pdf]

|                                     | Risk of bias |    |    |         |
|-------------------------------------|--------------|----|----|---------|
|                                     | D1           | D2 | D3 | Overall |
| Abbott et al., 2021                 | −            | −  | +  | −       |
| Akesdotter et al., 2022             | −            | +  | +  | −       |
| Al-Jumayan et al., 2021             | +            | ×  | +  | +       |
| Alwan et al., 2022                  | −            | −  | +  | −       |
| Anderson and Petrie 2012            | +            | ×  | +  | +       |
| Armento et al., 2023                | +            | −  | +  | +       |
| Barrack et al., 2008                | −            | −  | +  | −       |
| Barrack et al., 2023                | +            | −  | +  | +       |
| Beals and Hill, 2006                | −            | −  | +  | −       |
| Beals and Manore 2002               | +            | ×  | +  | +       |
| Beals, 2002                         | ×            | −  | ×  | ×       |
| Beekley et al., 2009                | +            | ×  | +  | +       |
| Borgelt and Burmeister, 2022        | −            | −  | +  | −       |
| Borowiec et al., 2023               | +            | −  | +  | +       |
| Brook et al., a 2019                | −            | +  | +  | −       |
| Brown et al., 2014                  | −            | −  | +  | −       |
| Brown et al., 2020                  | ×            | +  | ×  | ×       |
| Burrows et al., 2007                | −            | −  | +  | −       |
| Byrne and McLean 2002               | −            | −  | +  | −       |
| Carvalhais et al., 2019             | +            | ×  | +  | +       |
| Chatterton and Petrie 2013          | +            | ×  | +  | +       |
| Checa Olmos et al., 2023            | +            | −  | +  | +       |
| Cobb et al., 2003                   | −            | −  | +  | −       |
| Coelho et al., a 2013               | ×            | −  | ×  | ×       |
| Cox et al., 1997                    | −            | −  | +  | −       |
| De Borja et al., a 2021             | −            | −  | +  | −       |
| Dervish et al., 2023                | +            | −  | +  | +       |
| Devrim et al., 2018                 | −            | −  | +  | −       |
| Doyle-Lucas et al., 2010            | ×            | −  | ×  | ×       |
| Escobar-Molina et al., 2015         | −            | −  | +  | −       |
| Ferrand and Brunet, 2004            | −            | −  | ×  | ×       |
| Filaire et al., 2011                | ×            | −  | ×  | ×       |
| Flatt et al., 2021                  | +            | ×  | +  | +       |
| Fortes et al., 2013                 | +            | ×  | +  | +       |
| Ghazzawi et al., 2022               | +            | −  | +  | +       |
| Gibson et al., 2019                 | ×            | −  | ×  | ×       |
| Giel et al., 2016                   | +            | ×  | +  | +       |
| Glutz et al., 2013                  | −            | −  | +  | −       |
| Godoy-Izquierdo and Di.az, 2021     | −            | −  | ×  | ×       |
| Goutteborge and Kerkhoffs, 2017     | −            | +  | +  | −       |
| Goutteborge et al., 2017 (Study 1)  | −            | −  | +  | −       |
| Goutteborge et al., 2017 (Study 2)  | +            | +  | +  | +       |
| Greenleaf et al., 2009              | −            | −  | +  | −       |
| Gullivera et al., 2015              | −            | −  | +  | −       |
| Hauck et al., 2020                  | +            | ×  | +  | +       |
| Hoch et al., 2009                   | −            | −  | +  | −       |
| Hoch et al., 2011                   | ×            | +  | ×  | ×       |
| Hopkinson and Lock, 2004            | −            | −  | +  | −       |
| Hulley and Hill 2001                | ×            | −  | ×  | ×       |
| Janout and Janoutova.. 2004         | ×            | −  | ×  | ×       |
| Joubert et al., 2020                | +            | ×  | +  | +       |
| Joubert et al., 2022                | −            | −  | +  | −       |
| Junge and Hauschild, 2023           | +            | −  | +  | +       |
| Kampouri et al., 2019               | −            | −  | +  | −       |
| Karlson et al., 2001                | −            | −  | +  | −       |
| Karlsson et al., 2023               | +            | −  | +  | +       |
| Kennedy et al., 2017                | +            | ×  | +  | +       |
| Kristja..nsdo..tir et al., 2019     | +            | ×  | +  | +       |
| Lauder et al., 1999 (Study 1)       | −            | −  | +  | −       |
| Lauder et al., 1999 (Study 2)       | +            | ×  | +  | +       |
| Lichtenstein et al., 2021           | +            | ×  | +  | +       |
| Marshall and Harber 1996            | −            | −  | +  | −       |
| Marti..nez Rodri..guez et al., 2015 | −            | −  | +  | −       |
| Martinovic et al., 2022             | −            | −  | +  | −       |
| McLester et al., 2014               | +            | ×  | +  | +       |
| Meng et al., 2020                   | −            | −  | ×  | ×       |
| Michaels et al., 2023               | +            | −  | +  | +       |
| Monthuy-Blanc et al., 2010          | −            | −  | +  | −       |
| Muros et al., 2020                  | +            | ×  | +  | +       |
| Neves et al., 2017                  | ×            | +  | ×  | ×       |
| Nichols et al., 2006                | −            | −  | +  | −       |
| Nieves et al., 2016                 | −            | +  | +  | −       |
| OConnor et al., 1995                | ×            | −  | ×  | ×       |
| OConnell et al., 2023               | +            | −  | +  | +       |
| Okano et al., 2004                  | −            | −  | +  | −       |
| OLEary et al., 2023                 | +            | −  | +  | +       |
| Palotto et al., 2022                | −            | −  | +  | −       |
| Peklaj et al., 2022                 | −            | −  | +  | −       |
| Pensgaard et al., 2021              | +            | ×  | +  | +       |
| Pernick et al., 2006                | +            | ×  | +  | +       |
| Petisco-Rodri..guez et al., 2020    | −            | −  | +  | −       |
| Petrie et al., 2009                 | −            | −  | +  | −       |
| Pettersen et al., 2016              | ×            | −  | ×  | ×       |
| Poucher et al., 2022                | −            | +  | +  | −       |
| Prather et al., 2016                | −            | −  | +  | −       |
| Pritchett et al., 2021              | ×            | −  | ×  | ×       |
| Rauh et al., 2010                   | −            | +  | +  | −       |
| Ravaldi et al., 2003                | −            | −  | +  | −       |
| Ravi et al., 2021                   | +            | ×  | +  | +       |
| Reinking and Alexander, 2005        | −            | −  | +  | −       |
| Reinking, 2006                      | −            | +  | +  | −       |
| Riebl et al., 2007                  | −            | −  | +  | −       |
| Robbeson et al., 2015               | ×            | −  | ×  | ×       |
| Roberts and Kreipe, 2003            | −            | −  | +  | −       |
| Rogers et al., 2021                 | −            | −  | +  | −       |
| Rosendahl et al., 2009              | +            | ×  | +  | +       |
| Rousselet et al., 2017              | +            | ×  | +  | +       |
| Rouveix et al., 2007                | ×            | −  | ×  | ×       |
| Schtscherbyna et al., 2009          | −            | −  | +  | −       |
| Sharps et al., 2022                 | −            | −  | +  | −       |
| Smith et al., 2020                  | −            | −  | +  | −       |
| Sophia et al., 2022                 | −            | −  | +  | −       |
| Staal et al., 2018                  | −            | −  | ×  | ×       |
| Stackeov et al., 2023               | +            | −  | +  | +       |
| Sundgot-Borgen and Torstveit, 2004  | +            | ×  | +  | +       |
| Sundgot...Borgen et al., 2003       | +            | ×  | +  | +       |
| Sundgot-Borgen, 1993                | −            | −  | +  | −       |
| Sundgot-Borgen, 1994                | −            | −  | +  | −       |
| Syed et al., 2022                   | −            | −  | +  | −       |
| Teixidor-Battle et al., 2021        | +            | ×  | +  | +       |
| Tenforde et al., 2022               | +            | ×  | +  | +       |
| Terry et al., 1999                  | −            | −  | +  | −       |
| Thein-Nissenbaum et al., 2011       | −            | +  | +  | −       |
| Thein-Nissenbaum et al., 2014       | −            | +  | +  | −       |
| Thiel et al., 1993                  | −            | −  | +  | −       |
| Thompson 2007                       | −            | −  | +  | −       |
| Thompsonnet al., 2017               | −            | +  | +  | −       |
| Torres-McGehee et al., 2009         | −            | −  | +  | −       |
| Torres-McGehee et al., 2011         | −            | −  | +  | −       |
| Torres-McGehee et al., 2023         | +            | −  | +  | +       |
| Torstveit and Sundgot-Borgen, 2005  | +            | ×  | +  | +       |
| Torstveit et al., 2008              | −            | −  | +  | −       |
| Uriegas et al., 2021                | +            | ×  | +  | +       |
| Uriegas et al., 2023                | +            | −  | +  | +       |
| Vardar et al., 2005                 | −            | −  | +  | −       |
| Vardar et al., 2007                 | −            | −  | +  | −       |
| Walberg and Johnston, 1991          | −            | −  | +  | −       |
| Waryasz et al., 2020                | −            | −  | ×  | ×       |
| Wheeler et al., 1986                | −            | −  | ×  | ×       |
| Whitehead et al., 2020              | −            | −  | +  | −       |
| Wollenberg et al., 2015             | −            | −  | +  | −       |
| Wu et al., 2022                     | +            | ×  | +  | +       |

D1: Selection  
D2: Comparability  
D3: Exposure

Judgement  
× High  
− Moderate  
+ Low
