# Supplementary material for: A systematic review, meta-analysis, and meta-regression of the prevalence of self-reported disordered eating and associated factors among athletes worldwide
Source: PubMed Central journal article supplement (PMC10851573; doi:10.1186/s40337-024-00982-5), 2024-02-07

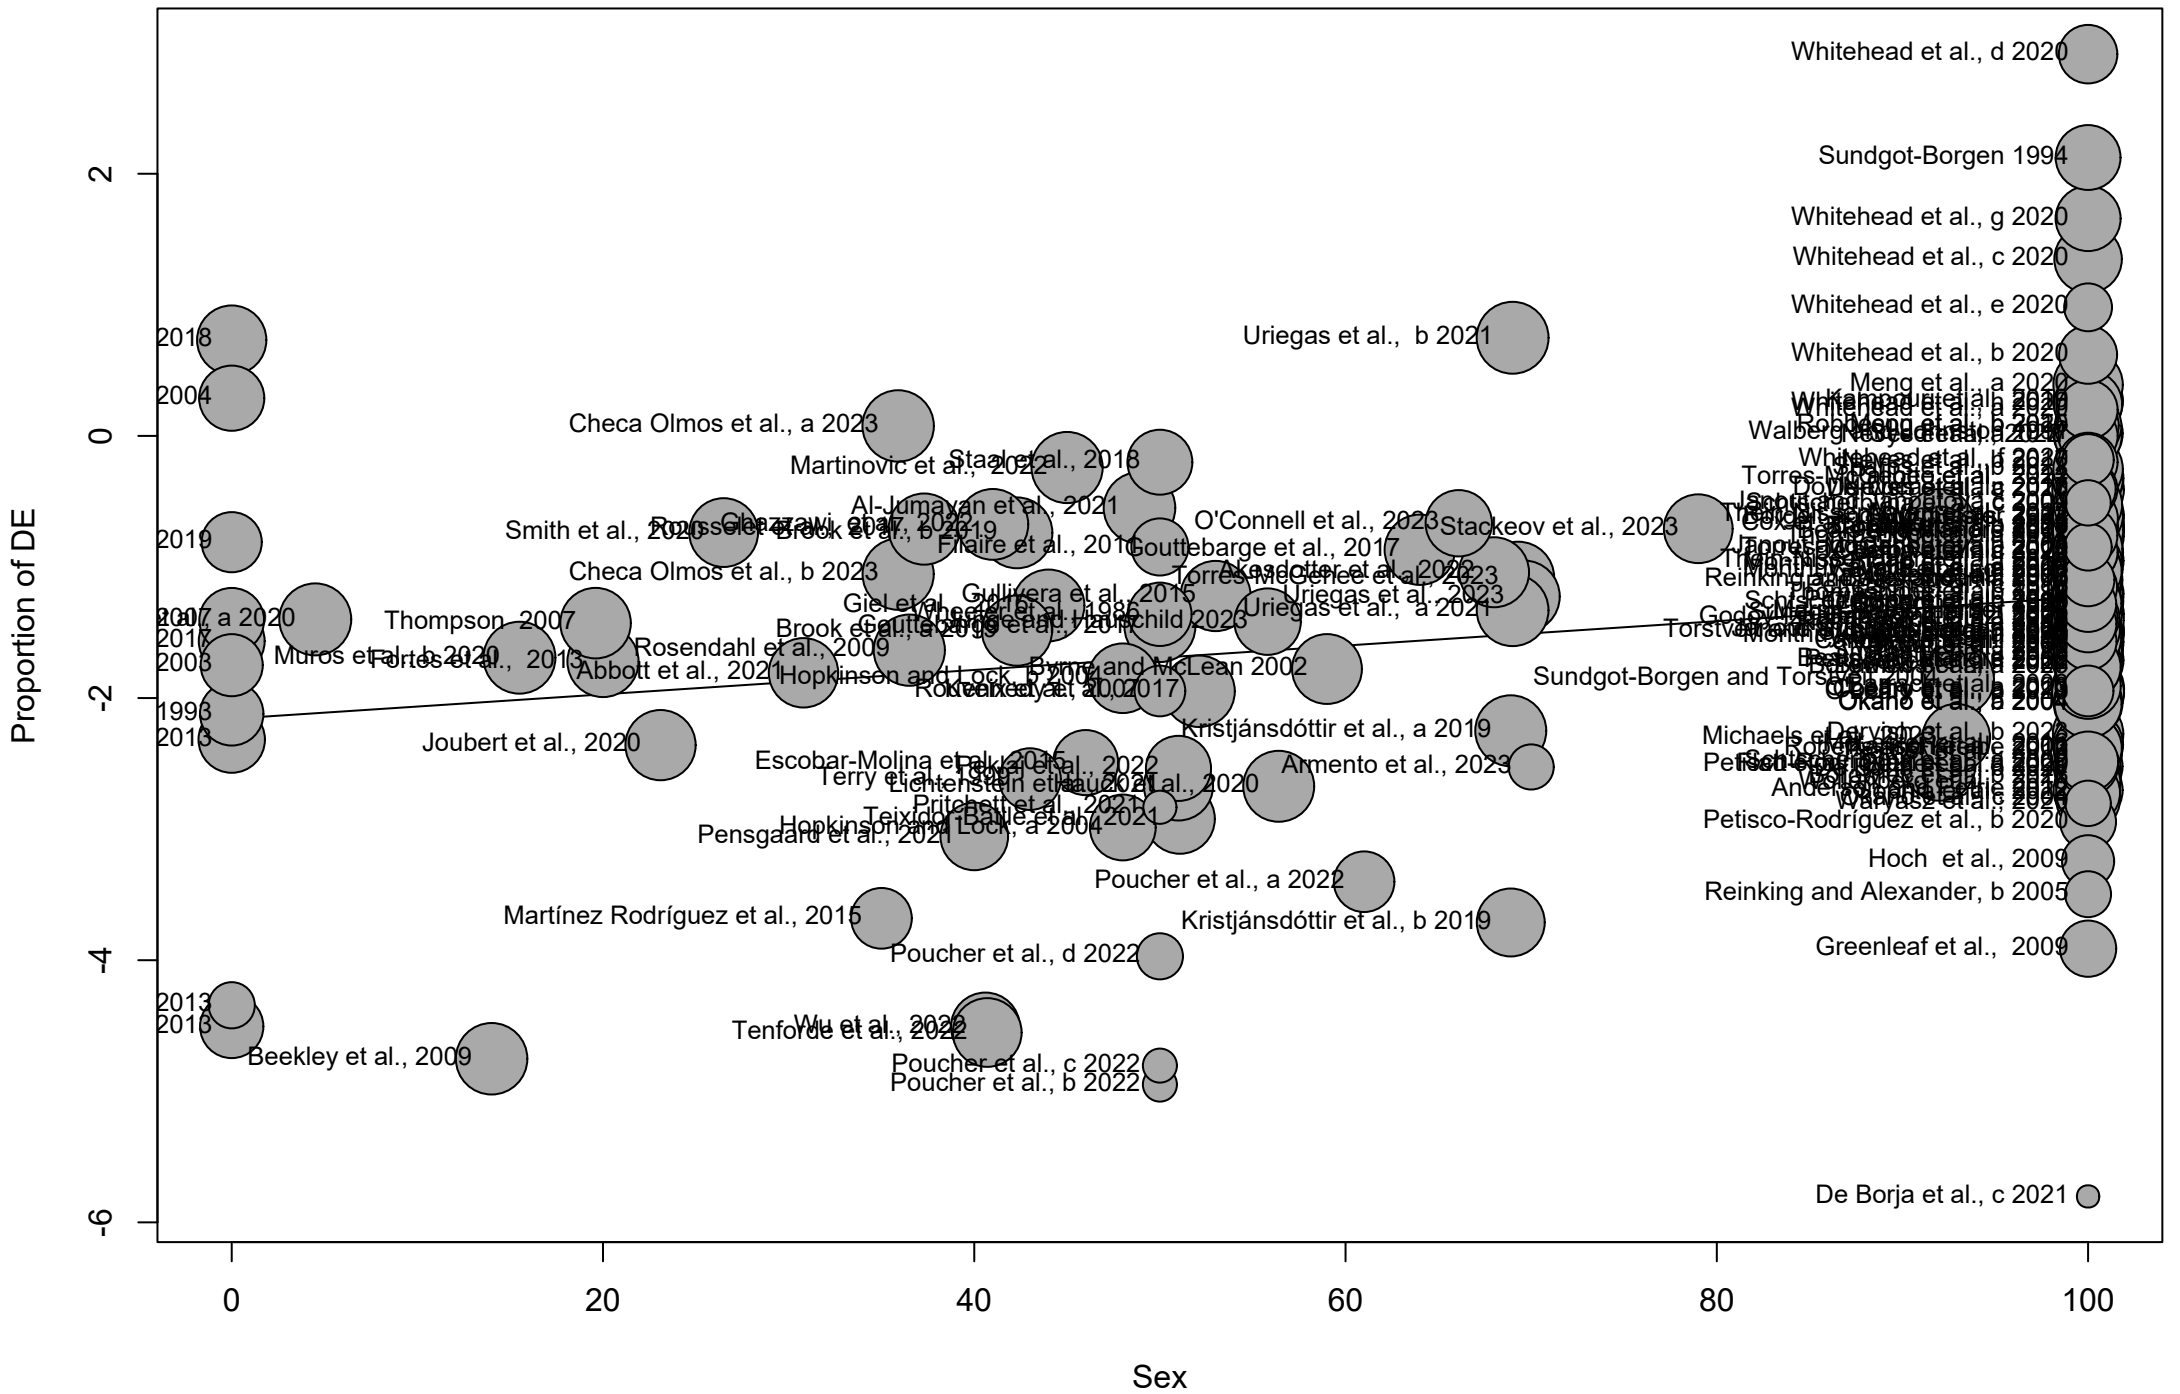

Supplement: 40337_2024_982_MOESM8_ESM.pdf [file 40337_2024_982_MOESM8_ESM.pdf]
